# Supplementary material for: Upregulated Expression of ERBB2/HER2 in Multiple Myeloma as a Predictor of Poor Survival Outcomes
Source: MDPI journal article supplement (doi:10.3390/ijms24129943), 2023-06-09
Supplement: s1 [file s1]

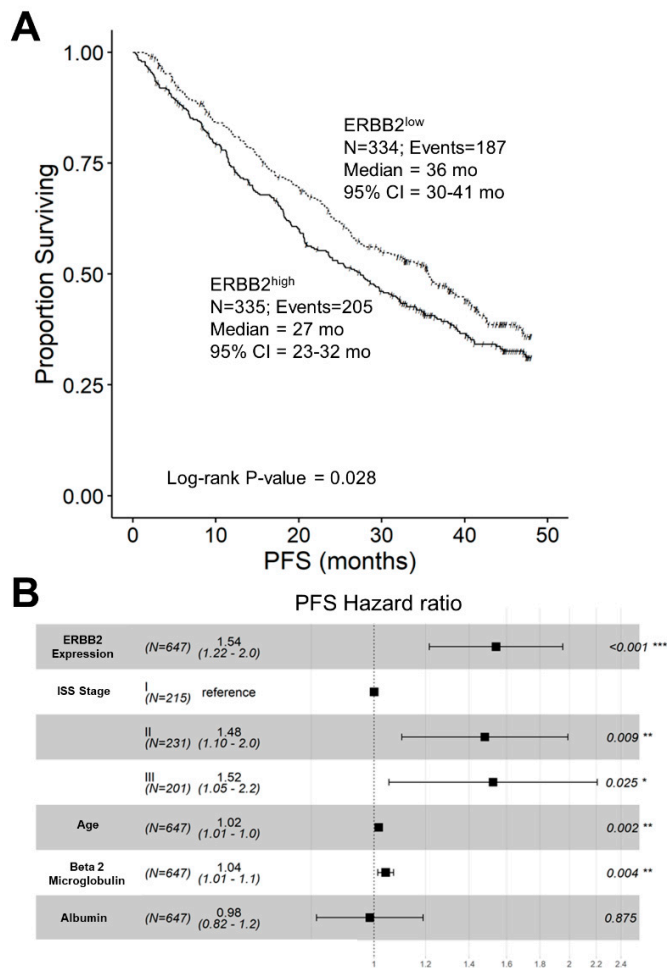

**Figure S1. Higher expression levels of ERBB2/HER2 in malignant plasma cells from MM patients is associated with shorter PFS**

**[A]** Depicted for comparison are the PFS curves (censored at 48 months) for 335 ERBB2<sup>high</sup> MM patients (i.e., patients with the top 50% of the highest observed expression level for FPKM-UQ aligned to the ERBB2 sequence) and 334 ERBB2<sup>low</sup> MM patients (i.e., 334 patients bottom 50% with the lowest observed expression level for FPKM-UQ aligned to the ERBB2 sequence). Cumulative proportion surviving progression-free at 48 mo:  $31.1 \pm 2.9\%$  for ERBB2<sup>high</sup> and  $35.9 \pm 3.1\%$  for ERBB2<sup>low</sup>. **[B]** Depicted is the Forest plot comparing the HRs for each covariate included in a multivariate Cox proportional hazards model, namely ERBB2 mRNA level, ISS stage, age, as well as serum albumin and beta 2 microglobulin levels. ERBB2 mRNA expression level exhibited a significant 1.54-fold increase in the hazard ratio for each unit increase in FPKM-UQ counts ( $P < 0.001$ ). Significant p-values are indicated by \*, \*\* and \*\*\* for  $p < 0.05$ ,  $p < 0.01$  and  $p < 0.001$  respectively.

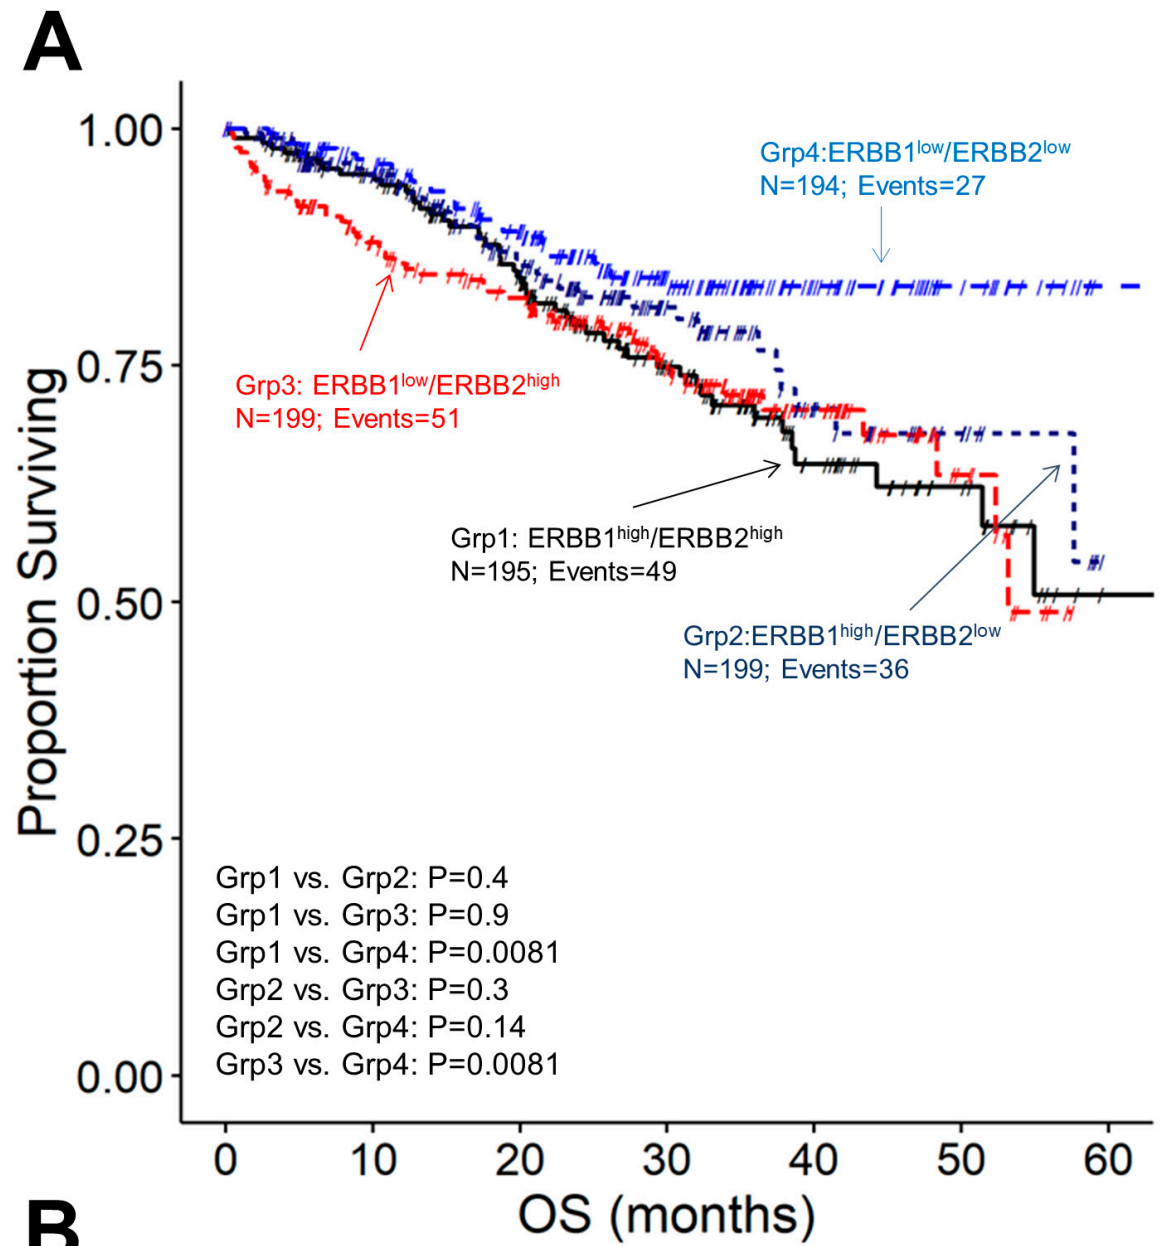

| Group | ERBB1/ERBB2 expression                       | N   | #Events | Median  | Lower 95% CI | Upper 95% CI | Cumulative surviving at 60 months (%) |
|-------|----------------------------------------------|-----|---------|---------|--------------|--------------|---------------------------------------|
| Grp1  | ERBB1 <sup>high</sup> /ERBB2 <sup>high</sup> | 195 | 49      | >60 mo  | 51.4         | NA           | 50.8 ± 9                              |
| Grp2  | ERBB1 <sup>high</sup> /ERBB2 <sup>low</sup>  | 199 | 36      | >60 mo  | 57.7         | NA           | 54.3 ± 12.9                           |
| Grp3  | ERBB1 <sup>low</sup> /ERBB2 <sup>high</sup>  | 199 | 51      | 53.2 mo | 52.3         | NA           | 48.9 ± 10                             |
| Grp4  | ERBB1 <sup>low</sup> /ERBB2 <sup>low</sup>   | 194 | 27      | >60 mo  | NA           | NA           | 83.3 ± 3                              |

**Figure S2.** The prognostic impact of ERBB1 and ERBB2 on Overall Survival (OS) in newly diagnosed MM patients from the MMRF-CoMMpass study. [A] Depicted for comparison are the OS curves for 4 distinct patient groups defined by co-expression levels of ERBB2 and ERBB1: (i)

ERBB1<sup>high</sup>/ERBB2<sup>high</sup> (top 50<sup>th</sup> percentile of the highest observed expression levels for both ERBB1 and ERBB2 mRNA expression levels) (N=195), (ii) ERBB1<sup>low</sup>/ERBB2<sup>low</sup> (bottom 50<sup>th</sup> percentile of the lowest observed expression levels for both ERBB1 and ERBB2 (N=194), (iii) ERBB1<sup>low</sup>/ERBB2<sup>high</sup> (N=199) and (iv) ERBB1<sup>high</sup>/ERBB2<sup>low</sup>(N=199). [**B**] ERBB1<sup>low</sup>/ERBB2<sup>low</sup> patients (Grp4) had fewer deaths and the best 5-year survival of 83.3%.

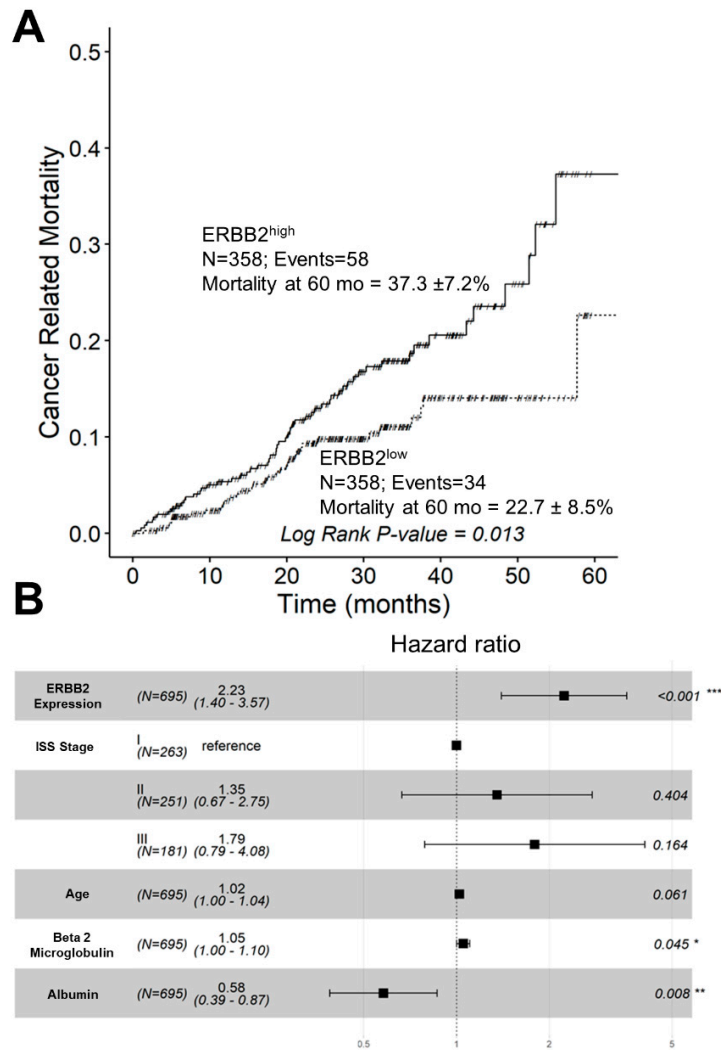

**Figure S3. Amplified expression of ERBB2 is associated with increased cancer-related mortality (CRM) in newly diagnosed MM patients from the MMRF-CoMMpass study.**

**[A]** Depicted for comparison are the CRM curves (censored at 60 months) for 358 ERBB2<sup>high</sup> patients (i.e., patients with the top 50% of the highest observed expression level for FPKM-UQ aligned to the ERBB2 sequence) and 358 ERBB2<sup>low</sup> patients (i.e., patients bottom 50% with the lowest observed expression level for FPKM-UQ aligned to the ERBB2 sequence). **[B]** Depicted is the Forest plot comparing the HRs for each covariate included in a multivariate Cox proportional hazards model, namely ERBB2 mRNA level, ISS stage, age, as well as serum albumin and beta 2 microglobulin levels. ERBB2 mRNA expression level exhibited a significant 2.23-fold increase in the hazard ratio for each unit increase in FPKM-UQ counts ( $P < 0.001$ ). Significant P-values are indicated by \*, \*\* and \*\*\* for  $p < 0.05$ ,  $p < 0.01$  and  $p < 0.001$  respectively.

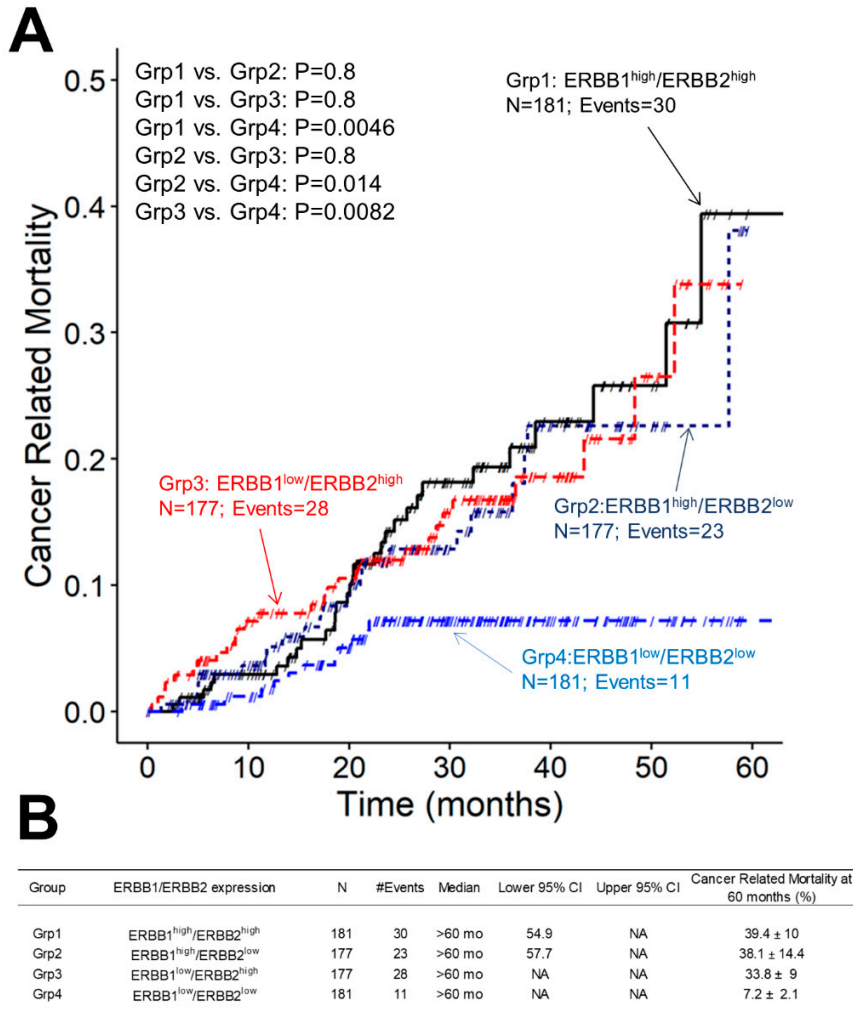

**Figure S4. The prognostic impact of ERBB1 and ERBB2 on cancer-related mortality (CRM) in newly diagnosed MM patients from the MMRF-CoMMpass study.**

[A] Depicted for comparison are the CRM curves for 4 distinct patient groups defined by co-expression levels of ERBB2 and ERBB1: (i) ERBB1<sup>high</sup>/ERBB2<sup>high</sup> (top 50<sup>th</sup> percentile of the highest observed expression levels for both ERBB1 and ERBB2 mRNA expression levels) (N=181), (ii) ERBB1<sup>low</sup>/ERBB2<sup>low</sup> (bottom 50<sup>th</sup> percentile of the lowest observed expression levels for both ERBB1 and ERBB2 (N=181) , (iii) ERBB1<sup>low</sup>/ERBB2<sup>high</sup> (N=177) and (iv) ERBB1<sup>high</sup>/ERBB2<sup>low</sup>(N=177). [B] ERBB1<sup>low</sup>/ERBB2<sup>low</sup> patients representing 25.3% of the 716 evaluable patients had significantly fewer cancer-related deaths consequently the lowest 5-year CRM (7.2±2.1%) when compared to the remaining 3 groups of patients (5-year CRM: ERBB1<sup>high</sup>/ERBB2<sup>high</sup> = 39.4 ± 10%, ERBB1<sup>high</sup>/ERBB2<sup>low</sup> = 38.1 ± 14.4%, ERBB1<sup>low</sup>/ERBB2<sup>high</sup> = 33.8 ± 9%).
